# Supplementary material
Source: publisher figshare collection journal article supplement (https://acs.figshare.com/ndownloader/files/4760224)
Supplement: Supplementary file 1 [file 4760224]

## Supplementary Information

### Synthesis:

The PS-PI diblock copolymer was synthesized using standard sequential anionic polymerization techniques. Styrene and isoprene were purified by treating with dibutyl magnesium for 4 h and *n*-butyl lithium for 4 h. Styrene was initiated by *sec*-butyllithium under an argon atmosphere and polymerized for 4 hours at 40 °C in cyclohexane, which was followed by isoprene addition, also polymerized for 4 hours at 40 °C. The polymerization was terminated with degassed methanol.

### Crosslinking procedure:

The B $\mu$ E sample was placed in a Petri dish and contained in a closed glass jar. Sulfur monochloride (S<sub>2</sub>Cl<sub>2</sub>) was then added into the glass jar but outside the Petri dish. The S<sub>2</sub>Cl<sub>2</sub> molecules were slowly absorbed into the B $\mu$ E sample by vapor phase transfer.

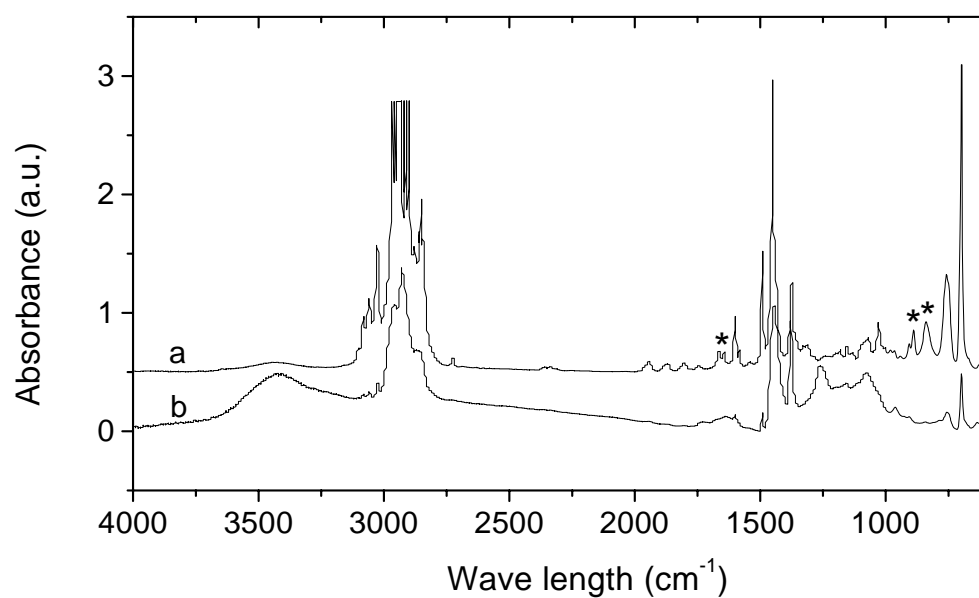

**Figure S1.** IR spectra of the BμE precursor (a) and the resultant nanoporous material (b). The \* denotes the characteristic peaks from the double bonds of polyisoprene. The plots are shifted for clarity.

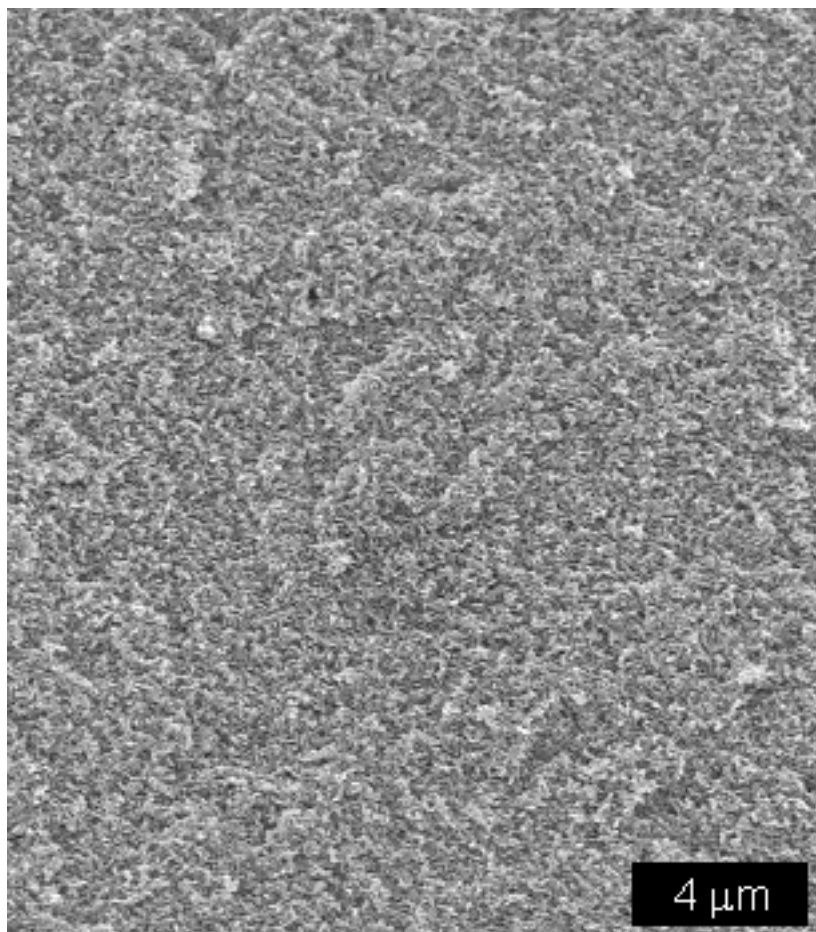

(a)

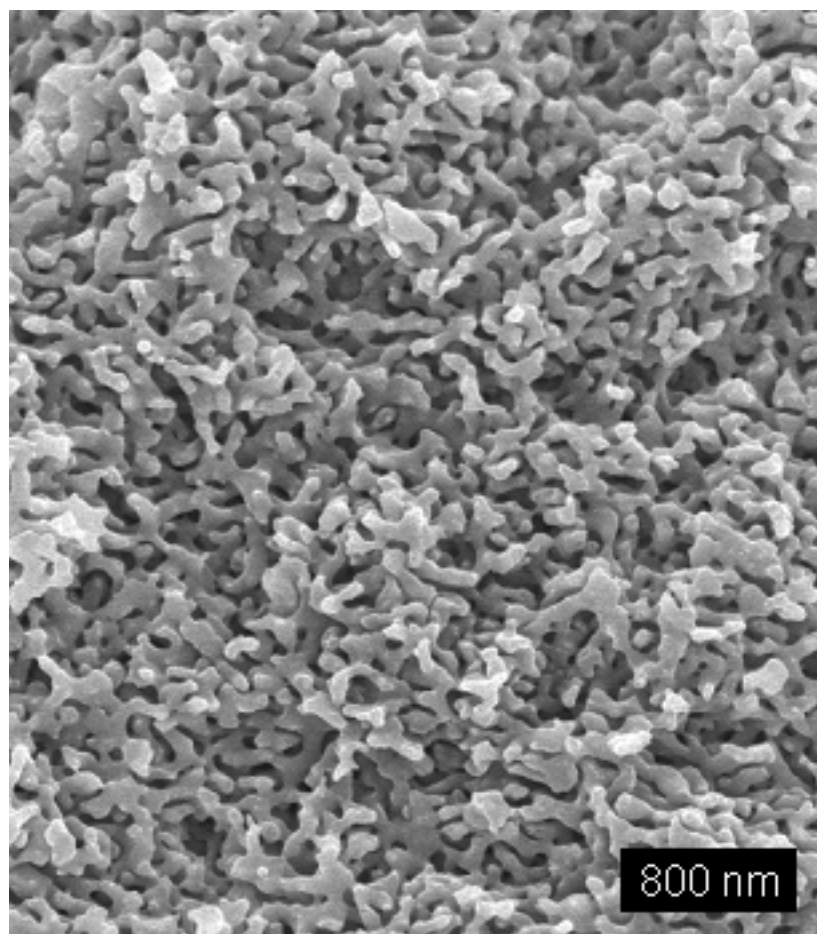

(b)

**Figure S2.** SEM images of the freeze-fractured surface of nanoporous material from the B $\mu$ E sample under two different magnifications: a)  $\times 5,000$ ; b)  $\times 25,000$ .

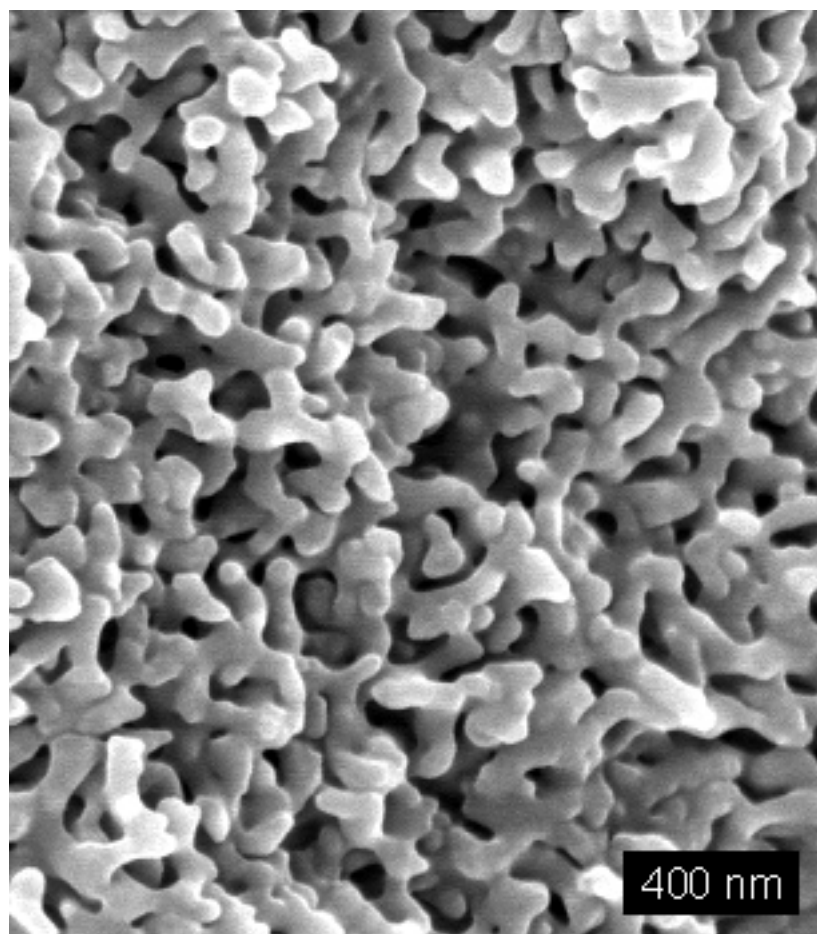

(a)

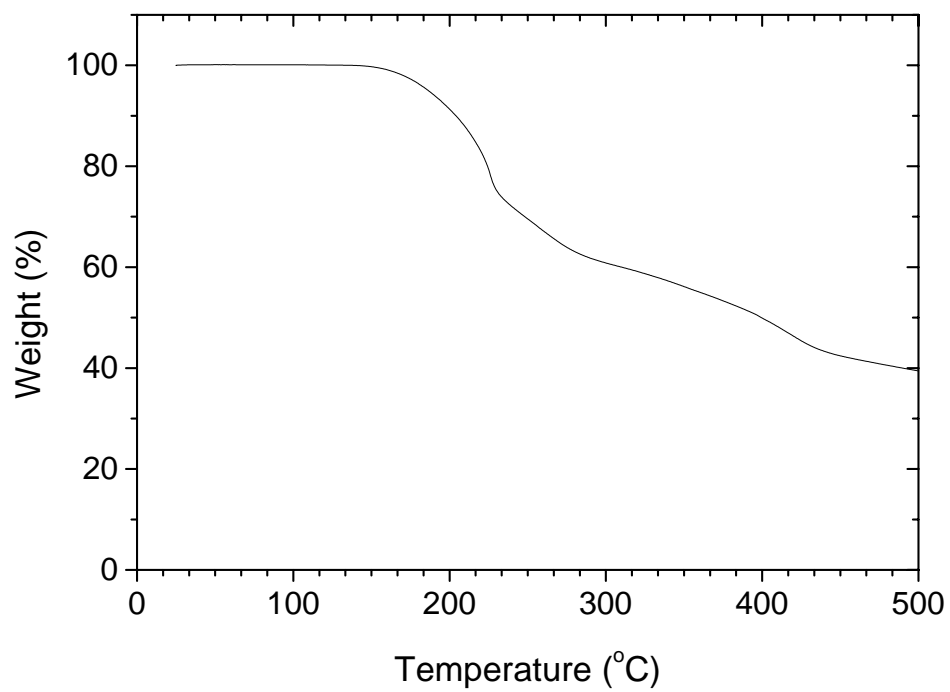

(b)

**Figure S3.** (a) SEM image of the nanoporous material after being annealed at 200 °C for 3 hours under vacuum. (b) Thermogravimetric analysis of the nanoporous material.
